# Supplementary material
Source: publisher figshare collection journal article supplement (https://karger.figshare.com/ndownloader/files/12822059)
Supplement: Supplementary file 1 [file 12822059]

Table 1. Characteristics of the study population at baseline

| **Parameters** | **N** | **Values** |
| --- | --- | --- |
| Age in years (mean, SD) | 150 | 10.1 (1.5) |
| Sex (N, %) |  |  |
| - Male | 77 | 51.3 |
| - Female | 73 | 48.7 |
| STH infection (N, n %) |  |  |
| - Any STH | 143 | 28 (19.6) |
| - *Ascaris lumbricoides* | 143 | 12 (8.4) |
| - *Trichuris trichiura* | 143 | 16 (11.2) |
| - hookworm | 143 | 7 (4.9) |
| Skin prick reactivity (N, n %) |  |  |
| - Any allergen | 150 | 28 (18.7) |
| - *Blatella germanica* (cockroach) | 150 | 26 (17.3) |
| - House dust mite | 150 | 4 (2.7) |
| - - *Dermatophagoides pteronyssinus* | 150 | 4 (2.7) |
| - - *Dermatophagoides farinae* | 150 | 3 (2.0) |

Table 2. Changes in immune parameters following MDA in total study population

| Parameter | Baseline  (median, IQR) | Follow up  (median, IQR) | Estimate (95% CI) | P value |
| --- | --- | --- | --- | --- |
| Total IgE (IU/mL) | 667.87 (316.67 – 877.36, n=146) | 109.10 (27.90 – 628.17, n=112) | 0.30 (0.22 – 0.42) | <0.0001 |
| Eosinophil count (%) | 8 (5 – 11, n=150) | 5 (3 – 8, n=111) | 0.70 (0.61 – 0.80) | <0.001 |
| CRP (mg/L) | 1.71 (0.53 – 6.23, n= 150) | 0.95 (0.11 – 3.47, n=112) | 0.60 (0.42 – 0.86) | 0.006 |

Estimated changes of total IgE, eosinophil count and CRP following MDA are displayed with corresponding 95% CI. Estimate and 95% confidence interval are based on generalized linear mixed models from log-transformed data. Values shown are back-transformed. P values are generated using a likelihood ratio test comparing a model with and without a time effect.
